# Supplementary material
Source: PubMed Central journal article supplement (PMC3072691)

#### Figure Caption for Supplemental Figure

To estimate the amount of amorphous phase yielded by the addition of enamel in to 10%rP148, the X-ray diffraction pattern of the product grown in (A)10% rP148 was overlapped with XRD profiles of (B) 4 $\mu$ g/ml enamel in 10% rP148 (10%rP148+4En), (C) 10 $\mu$ g/ml enamel in 10% rP148 (10%rP148+10En), (D) 40 $\mu$ g/ml enamel in 10% rP148 (10%rP148+40En) and (E) 40 $\mu$ g/ml enamel (40En). The profile of A 10%rP148 is drawn with blue line. The profile of the cation selective membrane (red line) was also overlapped with the other profiles for a comparison. The profiles of A(+membrane), B (+A+membrane), C (+A+membrane), D (+A+membrane), E (+A+membrane) are given in Figures A, B, C, D and E.

A : rP148

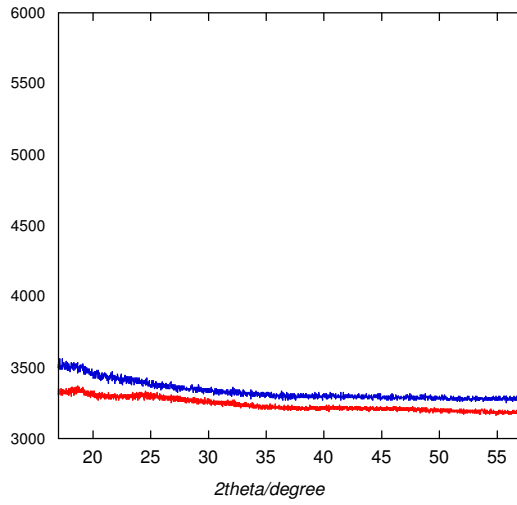

B : rP148+4En

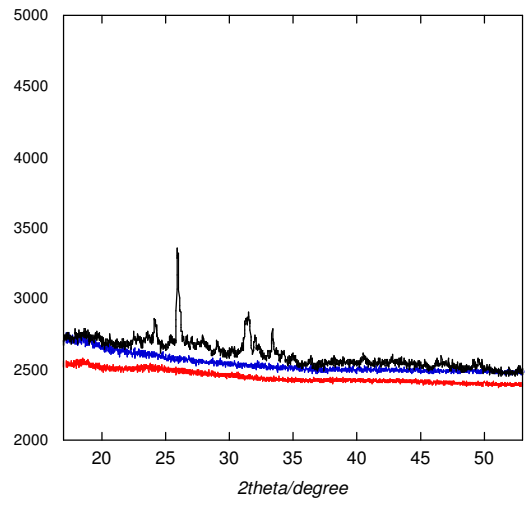

C : rP148+10En

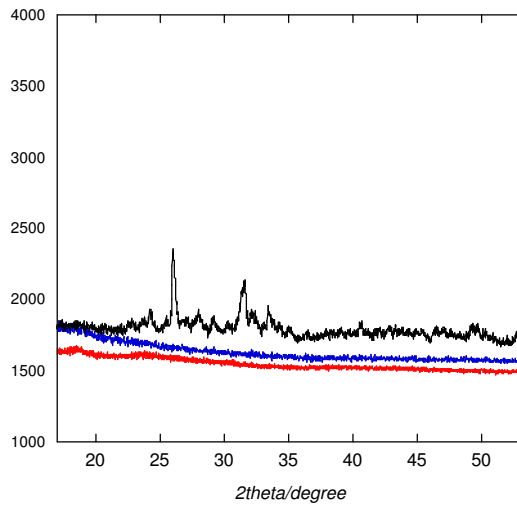

D : rP148+40En

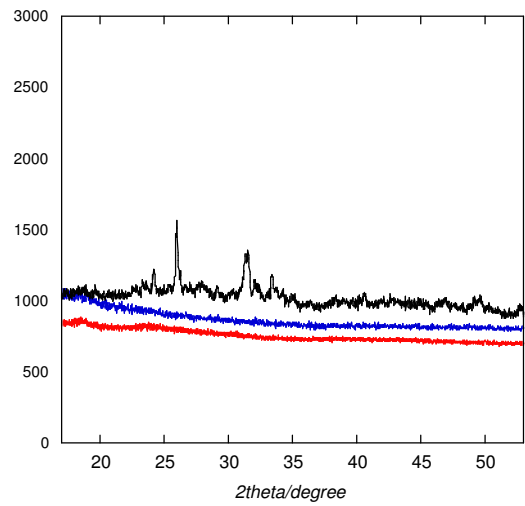

E : 40En

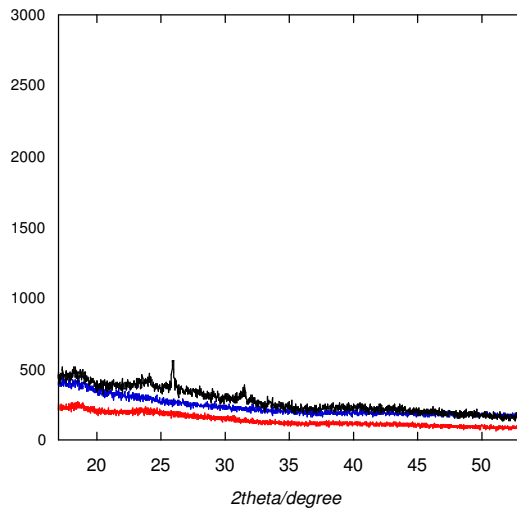

Supplement: NIHMS244131-supplement-1_si_001.pdf [file NIHMS244131-supplement-1_si_001.pdf]
